# Supplementary material for: Cryo-EM structure of a type IV secretion system
Source: PubMed Central journal article supplement (PMC9259494; doi:10.1038/s41586-022-04859-y), 2022-06-22
Supplement: 41586_2022_4859_MOESM3_ESM.pdf [file 41586_2022_4859_MOESM3_ESM.pdf]

## **SI Table 1-3**

### Cryo-EM structure of a type IV secretion system

Kévin Macé, Abhinav K. Vadakkepat, Adam Redzej, Natalya Lukoyanova, Clasiën Oomen,  
Nathalie Braun, Marta Ukleja, Fang Lu, Tiago R.D. Costa, Elena V. Orlova, David Baker, Qian  
Cong, and Gabriel Waksman

**SI Table 1a.** Cryo-EM data collection and processing statistics and supplementary information. The supplementary information part of this table provides information on how each map was used, the part(s) that were built in each map when relevant, the method that was used to build the model from each map when relevant, and the PDB entry code of the corresponding model.

| Complex/Subcomplex                                  | T4SS                               |                |                    |                    |                                             |                            |                        |                 |                 |                      | TrwK/VirB4unbound          |                 |
|-----------------------------------------------------|------------------------------------|----------------|--------------------|--------------------|---------------------------------------------|----------------------------|------------------------|-----------------|-----------------|----------------------|----------------------------|-----------------|
| Name of the maps generated in this study            | <i>Ab initio</i> model for OMCC C1 | OMCC C1 3.28 Å | O-layer C14 2.58 Å | I-layer C16 3.08 Å | <i>Ab initio</i> model for IMC-Arches-Stalk | IMC-Arches-Stalk C1 6.18 Å | IMC protomer C1 3.75 Å | Stalk C1 3.71 Å | Stalk C5 3.28 Å | IMC-Arches C6 8.33 Å | Trimer of dimers C1 4.14 Å | Dimer C1 3.49 Å |
| EMDB entry                                          | EMD-13765                          | EMD-13765      | EMD-12707          | EMD-12708          | EMD-13766                                   | EMD-13767                  | EMD-12933              | EMD-12709       | EMD-13768       | EMD-12715            | EMD-12716                  | EMD-12717       |
| <b>Data collection and processing</b>               |                                    |                |                    |                    |                                             |                            |                        |                 |                 |                      |                            |                 |
| Magnification                                       | 130,000                            |                |                    |                    |                                             |                            |                        |                 |                 |                      | 165,000                    |                 |
| Voltage (kV)                                        | 300                                |                |                    |                    |                                             |                            |                        |                 |                 |                      | 300                        |                 |
| Electron exposure (e <sup>-</sup> /Å <sup>2</sup> ) | 54                                 |                |                    |                    |                                             |                            |                        |                 |                 |                      | 49                         |                 |
| Defocus range (µm)                                  | -1.5 to -3.5                       |                |                    |                    |                                             |                            |                        |                 |                 |                      | -1.2 to 2.8                |                 |
| Pixel size (Å)                                      | 1.067                              | 1.067          | 1.067              | 1.067              | 2.134                                       | 1.067                      | 1.067                  | 1.067           | 1.067           | 2.134                | 1.048                      | 1.048           |
| Symmetry imposed                                    | C1                                 | C1             | C14                | C16                | C1                                          | C1                         | C1                     | C1              | C5              | C6                   | C1                         | C1              |
| Initial particle images (no.)                       | 1,729,311                          | 1,729,311      | 1,729,311          | 1,729,311          | 443,336                                     | 1,729,311                  | 1,729,311              | 1,729,311       | 1,729,311       | 1,729,311            | 1,622,003                  | 1,622,003       |
| Final particle images (no.)                         | 100,000                            | 1,729,311      | 709,769            | 950,171            | 28,902                                      | 566,815                    | 566,815                | 566,815         | 566,815         | 15,239               | 209,217                    | 209,217         |
| Map resolution (Å)                                  | 3.52                               | 3.28           | 2.58               | 3.08               | 8.42                                        | 6.18                       | 3.75                   | 3.71            | 3.28            | 8.33                 | 4.1                        | 3.5             |
| FSC threshold                                       | 0.143                              | 0.143          | 0.143              | 0.143              | 0.143                                       | 0.143                      | 0.143                  | 0.143           | 0.143           | 0.143                | 0.143                      | 0.143           |
| Map resolution range (Å)                            | 3.0-5.0                            | 2.9-4.0        | 2.4-3.0            | 2.9-3.2            | 7.0-15                                      | 3.0-7.5                    | 3.1-6.5                | 3.0-7.0         | 2.8-4.5         | 7.0-15               | 3.5-9.0                    | 3.0-7.2         |
| Map sharpening B factor (Å <sup>2</sup> )           | -114.4                             | -168.8         | -41.2              | -80.4              | -565.1                                      | -468.7                     | 119.7                  | -81.7           | -87.03          | -844.2               | -126.1                     | -137            |

**Additional information**

|                          |                                                                            |                                           |                                                                    |                                               |                                                       |                                                                                                                                                                  |                                                               |                                                                       |                                                                    |                                                                                                                                                     |                                               |                                         |
|--------------------------|----------------------------------------------------------------------------|-------------------------------------------|--------------------------------------------------------------------|-----------------------------------------------|-------------------------------------------------------|------------------------------------------------------------------------------------------------------------------------------------------------------------------|---------------------------------------------------------------|-----------------------------------------------------------------------|--------------------------------------------------------------------|-----------------------------------------------------------------------------------------------------------------------------------------------------|-----------------------------------------------|-----------------------------------------|
| Map was used to          | As initial model for OMCC C1 3D refinement. Determine the O-layer symmetry | Establish the symmetry of O- and I-layers | Build the O-layer                                                  | Build the I-layer                             | As initial model for 3D classification and refinement | 1- Establish symmetry of IMC, Stalk and Arches   2- Initial reference for final reconstruction of the IMC protomer and the Stalk   3- Fit TrwG/VirB8peri domains | Build the IMC protomer                                        | Build the Stalk including membrane helices                            | Improve the periplasmic part of the Stalk                          | 1- Determine the NCS operators to generate the IMC-Arches hexameric model   2- Position the OMCC C1 map to generate the entire T4SS composite model | Build the trimer of form of TrwK/VirB4unbound | Build the first structure of TrwK/VirB4 |
| Part(s) built in the map | N/A                                                                        | N/A                                       | 14xTrwH/<br>VirB7<br>14xTrwF/<br>VirB9CTD<br>14xTrwE/<br>VirB10CTD | 16xTrwF/<br>VirB9NTD<br>16xTrwE/<br>VirB10NTD | N/A                                                   | 3 x TrwG/<br>VirB8peri                                                                                                                                           | 1xTrwM/<br>VirB3<br>2xTrwK/<br>VirB4<br>3xTrwG/<br>VirB8tails | 5xTrwJ/<br>VirB5<br>5xTrwI/<br>VirB6 with<br>transmembrane<br>helices | 5xTrwJ/<br>VirB5 and<br>periplasmic<br>part of<br>5xTrwI/<br>VirB6 | N/A                                                                                                                                                 | Build the trimer of dimers                    | TrwK/VirB4unbound dimer                 |
| Modelling method         | N/A                                                                        | Rigid body                                | Building and refinement                                            | Building and refinement                       | N/A                                                   | Rigid body                                                                                                                                                       | Building and refinement                                       | Building and refinement                                               | Building and refinement                                            | N/A                                                                                                                                                 | Rigid body                                    | Building and refinement                 |
| PDB deposited            | N/A                                                                        | 7O3J & 7O3T                               | 7O3J                                                               | 7O3T                                          | N/A                                                   | 7Q1V                                                                                                                                                             | 7O1U                                                          | 7O3V                                                                  | 7O3V                                                               | 7O41                                                                                                                                                | 7O42                                          | 7O43                                    |

**SI Table 1b.** Model building and validation statistics.

| Complex/Subcomplex                 | T4SS             |                |                 |                  |                 |                            | TrwK/VirB <sub>4</sub> <sub>unbound</sub>                  |                                                 |
|------------------------------------|------------------|----------------|-----------------|------------------|-----------------|----------------------------|------------------------------------------------------------|-------------------------------------------------|
| Structures generated in this study | O-Layer          | I-Layer        | Stalk           | IMC protomer     | Arches protomer | IMC-Arches hexameric model | TrwK/VirB <sub>4</sub> <sub>unbound</sub> trimer of dimers | TrwK/VirB <sub>4</sub> <sub>unbound</sub> dimer |
| PDB entry                          | 7O3J             | 7O3T           | 7O3V            | 7OIU             | 7Q1V            | 7O41                       | 7O42                                                       | 7O43                                            |
| <b>Refinement<sup>1</sup></b>      |                  |                |                 |                  |                 |                            |                                                            |                                                 |
| EMDB corresponding                 | EMD-12707        | EMD-12708      | EMD-12709       | EMD-12715        | EMD-13767       | ---                        | EMD-12716                                                  | EMD-12717                                       |
| Initial model used (PDB code)      | 3ZBI             | 6GYB           | <i>de novo</i>  | <i>de novo</i>   | 2BHM            | 7O41 & 7Q1V                | <i>de novo</i>                                             | <i>de novo</i>                                  |
| Model resolution (Å)               | 2.8              | 3.2            | 4               | 4                | 2.9             | ---                        | 4.4                                                        | 4.1                                             |
| FSC threshold                      | 0.5              | 0.5            | 0.5             | 0.5              | 0.5             | ---                        | 0.5                                                        | 0.5                                             |
| CC Model vs. Data (mask)           | 0.82             | 0.83           | 0.74            | 0.77             | 0.62            | ---                        | 0.79                                                       | 0.71                                            |
| <b>Model composition</b>           |                  |                |                 |                  |                 |                            |                                                            |                                                 |
| Nonhydrogen atoms                  | 38528            | 17456          | 15742           | 12744            | 1647            | 86328                      | 43120                                                      | 12.551                                          |
| Protein residues                   | 5068             | 2144           | 2153            | 1683             | 411             | 12564                      | 5617                                                       | 1630                                            |
| Ligands                            | ---              | ---            | ---             | ---              | ---             | ---                        | ---                                                        | ---                                             |
| <b>B factors (Å<sup>2</sup>)</b>   |                  |                |                 |                  |                 |                            |                                                            |                                                 |
| Protein                            | 70.53 (123 – 46) | 45.8 (91 – 22) | 43.42 (74 – 12) | 90.45 (152 – 50) | 0.99 (0.57 – 4) | 80.23(0.57-152)            | 240.60 (611 – 76)                                          | 92.09 (194 – 42)                                |
| Ligand                             | ---              | ---            | ---             | ---              | ---             | ---                        | ---                                                        | ---                                             |
| <b>R.m.s. deviations</b>           |                  |                |                 |                  |                 |                            |                                                            |                                                 |
| Bond lengths (Å)                   | 0.008            | 0.011          | 0.004           | 0.004            | 0.008           | 0.006                      | 0.006                                                      | 0.005                                           |
| Bond angles (°)                    | 0.654            | 0.735          | 0.701           | 0.666            | 2.065           | 1.152                      | 1.044                                                      | 1.01                                            |
| <b>Validation<sup>1</sup></b>      |                  |                |                 |                  |                 |                            |                                                            |                                                 |
| MolProbity score                   | 1.37             | 1.6            | 1.73            | 1.85             | 0.96            | 1.8                        | 2.05                                                       | 2.01                                            |
| Clashscore                         | 5.76             | 10.41          | 11.15           | 10.07            | 1.92            | 10.02                      | 9.69                                                       | 6.29                                            |
| Rotamer outliers (%)               | 0                | 0              | 0               | 0                | 0               | 0                          | 0.78                                                       | 0.32                                            |
| <b>Ramachandran plot</b>           |                  |                |                 |                  |                 |                            |                                                            |                                                 |
| Favored (%)                        | 97.74            | 97.69          | 97.03           | 95.32            | 98.52           | 95.97                      | 90.44                                                      | 84.69                                           |
| Allowed (%)                        | 2.26             | 2.31           | 2.97            | 4.68             | 1.48            | 4.03                       | 9.45                                                       | 15.13                                           |
| Disallowed (%)                     | 0                | 0              | 0               | 0                | 0               | 0                          | 0.11                                                       | 0.18                                            |

**SI Table 2.** Interface area between 2 subunits. “molX” refer to the chain identifier given in the deposited PDB.

| Interface between                      |                                  | Area (Å <sup>2</sup> ) |
|----------------------------------------|----------------------------------|------------------------|
| Name Molecule X                        | Name Molecule Y                  |                        |
| TrwK/VirB4 <sub>central</sub>          | TrwK/VirB4 <sub>central</sub>    | 833                    |
| TrwK/VirB4 <sub>central</sub>          | TrwK/VirB4 <sub>outside</sub>    | 1734                   |
| TrwK/VirB4 <sub>central</sub>          | TrwM/VirB3                       | 2805                   |
| TrwK/VirB4 <sub>central</sub> adjacent | TrwM/VirB3                       | 104                    |
| TrwK/VirB4 <sub>outside</sub>          | TrwG/VirB8 <sub>tails</sub> molA | 732                    |
| TrwK/VirB4 <sub>outside</sub>          | TrwG/VirB8 <sub>tails</sub> molB | 1236                   |
| TrwG/VirB8 <sub>tails</sub> molA       | TrwG/VirB8 <sub>tails</sub> molB | 803                    |
| TrwG/VirB8 <sub>tails</sub> molB       | TrwG/VirB8 <sub>tails</sub> molC | 506                    |
| TrwG/VirB8 <sub>tails</sub> molA       | TrwG/VirB8 <sub>tails</sub> molC | 310                    |
| TrwI/VirB6 molA                        | TrwI/VirB6 molE                  | 1357                   |
| TrwJ/VirB5 molE                        | TrwJ/VirB5 molD                  | 3969                   |
| TrwG/VirB8 <sub>peri</sub> mol1        | TrwG/VirB8 <sub>peri</sub> mol2  | 419                    |
| TrwG/VirB8 <sub>peri</sub> mol2        | TrwG/VirB8 <sub>peri</sub> mol3  | 464                    |
| TrwF/VirB9 <sub>NTD</sub>              | TrwF/VirB9 <sub>NTD</sub>        | 781                    |
| TrwK/VirB4 <sub>central</sub>          | TrwI/VirB6                       | 94                     |
| TrwM/VirB3                             | TrwI/VirB6                       | 330                    |
| TrwJ/VirB5                             | TrwI/VirB6 molA                  | 1003                   |
| TrwJ/VirB5                             | TrwI/VirB6 molB                  | 599                    |
| TrwF/VirB9 <sub>NTD</sub> molB         | TrwE/VirB10 <sub>NTD</sub> α1    | 426                    |
| TrwF/VirB9 <sub>NTD</sub> molE         | TrwE/VirB10 <sub>NTD</sub> α1    | 404                    |
| TrwE/VirB10 <sub>CTD</sub> molA        | TrwE/VirB10 <sub>CTD</sub> molD  | 2269                   |
| TrwE/VirB10 <sub>CTD</sub> molA        | TrwF/VirB9 <sub>CTD</sub> molB   | 1289                   |
| TrwF/VirB9 <sub>CTD</sub> molB         | TrwH/VirB7 molC                  | 1030                   |
| TrwF/VirB9 <sub>CTD</sub> molB         | TrwE/VirB10 <sub>CTD</sub> moln  | 717                    |
| TrwF/VirB9 <sub>CTD</sub> molB         | TrwF/VirB9 <sub>CTD</sub> molE   | 484                    |
| TrwE/VirB10 <sub>CTD</sub> molA        | TrwE/VirB10 <sub>CTD</sub> molk  | 349                    |
| TrwE/VirB10 <sub>CTD</sub> molA        | TrwE/VirB10 <sub>CTD</sub> molh  | 255                    |
| TrwE/VirB10 <sub>CTD</sub> molA        | TrwE/VirB10 <sub>CTD</sub> molF  | 231                    |
| TrwE/VirB10 <sub>CTD</sub> molA        | TrwF/VirB9 <sub>CTD</sub> molo   | 148                    |

**SI Table 3.** Strains, plasmids, constructs and oligonucleotides used in this study.**a. Strains used in this study**

| Strain                    | Description                                                                                                                                       | Reference  |
|---------------------------|---------------------------------------------------------------------------------------------------------------------------------------------------|------------|
| <i>E. coli</i> Top10      | F- mcrA Δ(mrr-hsdRMS-mcrBC) Φ80lacZΔM15 Δ lacX74 recA1 araD139 Δ(araleu)7697 galU galK rpsL (StrR) endA1 nupG.<br>Used for cloning.               | Invitrogen |
| <i>E. coli</i> BL21*(DE3) | F ompT hsdSB (rB <sup>-</sup> , mB <sup>-</sup> ) galdcmrne131 (DE3)<br>This strain is designed to overexpress high-levels of non-toxic proteins. | Invitrogen |

**b. Plasmids used in this study**

| Plasmid                      | Description and Reference                                                                                                                                                                         | Source                            |
|------------------------------|---------------------------------------------------------------------------------------------------------------------------------------------------------------------------------------------------|-----------------------------------|
| pASK-IBA3C                   | Cloning vector provides chloramphenicol (Cam) resistance and carries a C-terminal Strep-tag. Protein expression is under the control of Tet promoter                                              | Iba Life sciences                 |
| pCDFDuet-1 vector            | A dual MCS cloning vector with spectinomycin (Spec) resistance and carries C-terminal His-tag and Strep-tag in MCS1 and MCS2 respectively. Protein expression is under the control of T7 promoter | Novagen                           |
| pET29b:hcp1 <sub>C-His</sub> | pET29b vector containing hcp1 gene with a C-terminal His6-tag. It provides kanamycin (Kan) resistance. Protein expression is under the control of T7 promoter.                                    | Provided by Dr. Joseph D. Mougous |
| pMAK3                        | Wild-type T4SS conjugative plasmid of <i>Salmonella enterica</i> , share 97.3% DNA sequence identify with the pR388, which is also the wild-type T4SS conjugative plasmid                         | Lab material                      |

**c. Constructs used in this study**

| Construct                                                          | Description and Reference                                                                                                                                                                                                        | Source     | FP                    | RP                     |
|--------------------------------------------------------------------|----------------------------------------------------------------------------------------------------------------------------------------------------------------------------------------------------------------------------------|------------|-----------------------|------------------------|
| IBA3C:<br>trwMtrwK-L6-hcp1 <sub>C-Strep</sub>                      | C-terminal Strep-tagged TrwM (VirB3) and TrwK (VirB4) from <i>E. coli</i> R388 plasmid cloned in pASK-IBA3C plasmid, selected with chloramphenicol resistance and overexpressed under Tet promoter                               | This study | P1<br>P3              | P2<br>P4               |
| pCDFDuet-1:<br>traB <sub>C-His</sub> traG <sub>C-Strep</sub>       | C-terminal His-tagged TraB (VirB4) and Strep-tagged TraG (VirB11) from <i>E. coli</i> pKM101 plasmid cloned in MCS1 and MCS2 respectively of pCDFDuet-1 plasmid, with spectinomycin resistance, overexpressed under T7 promoter. | This study | P5<br>P7<br>P9<br>P11 | P6<br>P8<br>P10<br>P12 |
| pCDFDuet-1:<br>traB <sub>C-His</sub> traG (Q8D) <sub>C-Strep</sub> | TraB (VirB4)-TraG (VirB11) interface mutant with mutation of Q8D on TraG.                                                                                                                                                        | This study | P13                   | P14                    |

|                                                                            |                                                                                                                                                      |                                |                    |
|----------------------------------------------------------------------------|------------------------------------------------------------------------------------------------------------------------------------------------------|--------------------------------|--------------------|
| pCDFDuet-1:<br>traB <sub>C-His</sub> traG (R54E) <sub>C-Strep</sub>        | TraB (VirB4)-TraG (VirB11) interface mutant with mutation of R54E on TraG.                                                                           | This study                     | P15 P16            |
| pCDFDuet-1:<br>traB <sub>C-His</sub> traG (N55E) <sub>C-Strep</sub>        | TraB (VirB4)-TraG (VirB11) interface mutant with mutation of N55E on TraG.                                                                           | This study                     | P17 P18            |
| pCDFDuet-1:<br>traB <sub>C-His</sub> traG (K58E) <sub>C-Strep</sub>        | TraB (VirB4)-TraG (VirB11) interface mutant with mutation of K58E on TraG.                                                                           | This study                     | P19 P20            |
| pCDFDuet-1:<br>traB (E591R) <sub>C-His</sub> traG <sub>C-Strep</sub>       | TraB (VirB4)-TraG (VirB11) interface mutant with mutation of E591R on TraB.                                                                          | This study                     | P21 P22            |
| pCDFDuet-1:<br>traB (E594R) <sub>C-His</sub> traG <sub>C-Strep</sub>       | TraB (VirB4)-TraG (VirB11) interface mutant with mutation of E594R on TraB.                                                                          | This study                     | P23 P24            |
| pCDFDuet-1:<br>traB (A598E) <sub>C-His</sub> traG <sub>C-Strep</sub>       | TraB (VirB4)-TraG (VirB11) interface mutant with mutation of A589E on TraB.                                                                          | This study                     | P25 P26            |
| pCDFDuet-1:<br>traB (Y619R) <sub>C-His</sub> traG <sub>C-Strep</sub>       | TraB (VirB4)-TraG (VirB11) interface mutant with mutation of Y619 on TraB.                                                                           | This study                     | P27 P28            |
| pBADM11_trwN/virB1-trwE/virB10-Strep_rbs_trwD/virB11_rbs_10xHis-trwB/virD4 |                                                                                                                                                      | Redzej et al 2017 <sup>1</sup> |                    |
| pMAK3ΔtrwK/virB4                                                           | pMAK3 plasmid with an ampicillin cassette inserted into <i>trwK/virB4</i> gene                                                                       | This study                     | Rec1 Rec2          |
| pMAK3ΔtrwI/virB6                                                           | pMAK3 plasmid with a chloramphenicol cassette inserted into <i>trwI/virB6</i> gene                                                                   | This study                     | Rec3 Rec4          |
| pBADM11_trwI/virB6                                                         | TrwI (VirB6) from <i>E. coli</i> R388 plasmid cloned in pBADM11 plasmid, selected with carbenicillin resistance and overexpressed under ara promoter | This study                     | P29 P30<br>P31 P32 |
| pBADM11_trwI/virB6 <sub>C-Flag</sub>                                       | TrwI (VirB6) from <i>E. coli</i> R388 plasmid cloned in pBADM11 plasmid, selected with carbenicillin resistance and overexpressed under ara promoter | This study                     | P29 P33<br>P31 P32 |
| pBADM11_trwI/virB6(T41F) <sub>C-Flag</sub>                                 | TrwI/VirB6 mutant with mutation of T41F                                                                                                              | This study                     | P34 P35            |
| pBADM11_trwI/virB6(G48I) <sub>C-Flag</sub>                                 | TrwI/VirB6 mutant with mutation of G48I                                                                                                              | This study                     | P36 P37            |
| pBADM11_trwI/virB6(V60E) <sub>C-Flag</sub>                                 | TrwI/VirB6 mutant with mutation of V60E                                                                                                              | This study                     | P38 P39            |
| pBADM11_trwI/virB6(Q118E-Q122E) <sub>C-Flag</sub>                          | TrwI/VirB6 mutant with mutation of Q118E-Q122E                                                                                                       | This study                     | P40 P41            |
| pBADM11_trwI/virB6(Q118L-Q122F) <sub>C-Flag</sub>                          | TrwI/VirB6 mutant with mutation of Q118L-Q122F                                                                                                       | This study                     | P42 P43            |
| pBADM11_trwI/virB6(N105D-Q108E) <sub>C-Flag</sub>                          | TrwI/VirB6 mutant with mutation of N105D-Q108E                                                                                                       | This study                     | P44 P45            |
| pBADM11_trwI/virB6(N105L-Q108F) <sub>C-Flag</sub>                          | TrwI/VirB6 mutant with mutation of N105L-Q108F                                                                                                       | This study                     | P46 P47            |
| pBADM11_trwI/virB6(Q222E-S226E) <sub>C-Flag</sub>                          | TrwI/VirB6 mutant with mutation of Q222E-S226E                                                                                                       | This study                     | P48 P49            |
| pBADM11_trwI/virB6(Q222F-S226L) <sub>C-Flag</sub>                          | TrwI/VirB6 mutant with mutation of Q222F-S226L                                                                                                       | This study                     | P50 P51            |
| pBADM11_trwI/virB6(T19W-T92W) <sub>C-Flag</sub>                            | TrwI/VirB6 mutant with mutation of T19W-T92W                                                                                                         | This study                     | P52 P53<br>P54 P55 |
| pBADM11_trwI/virB6(T19W-A88W) <sub>C-Flag</sub>                            | TrwI/VirB6 mutant with mutation of T19W-A88W                                                                                                         | This study                     | P52 P53<br>P56 P57 |
| pBADM11_trwI/virB6(D23W-A88W) <sub>C-Flag</sub>                            | TrwI/VirB6 mutant with mutation of D23W-A88W                                                                                                         | This study                     | P58 P59<br>P56 P57 |
| pBADM11_trwI/virB6(Q15W-D96W) <sub>C-Flag</sub>                            | TrwI/VirB6 mutant with mutation of Q15W-D96W                                                                                                         | This study                     | P60 P61<br>P62 P63 |

## d. Primers used in this study

| Primer name | Primer-Sequence (5'-3')                                                                                               |
|-------------|-----------------------------------------------------------------------------------------------------------------------|
| P1          | GGTAGCGGCTCTGGTAGCATGGCTGTTGATATGTTCAATCAAG                                                                           |
| P2          | CCAAGCGCTCTCGAGGGCCTGCACGTTT                                                                                          |
| P3          | CAGGCCCTCGAGAGCGCTTGGAGCCACCCGCA                                                                                      |
| P4          | GCTACCAGAGCCGCTACCTACGTCGCTCCTTTGGCTTTT                                                                               |
| P5          | TAAGTGCAGGTCGACAAGCT                                                                                                  |
| P6          | GGTATATCTCCTTATTAAGTTAAA                                                                                              |
| P7          | ATAAGGAGATATACCATGAGAGCTGCCACCGCTAC                                                                                   |
| P8          | GTCGACCTGCAGTTAGTGGTGATGATGGTGATGAGCC                                                                                 |
| P9          | CATTCAGCATTTCATGGTTTG                                                                                                 |
| P10         | AGGGCATCGTTCCACTG                                                                                                     |
| P11         | TGGGAACGATGCCCTATGACTGATGCAGCTTTCTATCAAC                                                                              |
| P12         | TGCAAATGCTGAATGTTATTTTTCGAACTGCGGGTGGC                                                                                |
| P13         | TTTCTATGATCTTGGCCCACTGCGCGAGTATTTAGAAGATCCTACTGTTTTTGAATTCGCATTAAGTCTTTCAGG                                           |
| P14         | CCAAGATCATAGAAAGCTGCATCAGTCATGATATCATAGATATCCAATTGAGATCTGCCATATGTATATCTCCTTCTTATACTTAACATAATACTAAGATGGGGAATTGTTATCCGC |
| P15         | TTTTATTGAAAACCTTGCTAAATCGTTGGTGAGC                                                                                    |
| P16         | AGGTTTTCAATAAAATCTGCCGTAATTGCCGC                                                                                      |
| P17         | TATTAGGGAACCTTGCTAAATCGTTGGTGAGC                                                                                      |
| P18         | GCAAGTCCCTAATAAAATCTGCCGTAATTGCC                                                                                      |
| P19         | CCTTGCTGAATCGTTGGTGAGCAGCAACAAG                                                                                       |
| P20         | AACGATTCAGCAAGGTTCTAATAAAATCTGCC                                                                                      |
| P21         | GGTACCCGCTCTGGCTGAAGGCGTTGATGC                                                                                        |
| P22         | GCCAGACGGGTAGCCATCGTTGCGCTG                                                                                           |
| P23         | ACTGGCTCGTGGCGTTGATGCGGTTATGGG                                                                                        |
| P24         | ACGCCACGAGCCAGTTCGGTAGCCATCG                                                                                          |
| P25         | CGTTGATGAAGTTATGGGGGAAGGCTCACTTATCCACGCG                                                                              |
| P26         | ATAACTTCATCAACGCCTTCAGCCAGTTCGGTAGCCATCG                                                                              |
| P27         | GGACGGGCGTGTGAATGAAGTTGTGGAAAATGGCGTATCACTGAAAGGGCTGCTGCGCGAATGGACGC                                                  |
| P28         | TTCACACGCCCGTCCAGGATCGTAACGGTGCAGCGCTCGCGTGAATAAGTGAGC                                                                |
| P29         | CAGGAGGAATTAACCATGGCCTTCGAGCTGTTACACCCG                                                                               |
| P30         | AACAGCCAAGCTCTTACTACCCTGCTTTGCGTCCCGC                                                                                 |
| P31         | GAGAGCTTGGCTGTTTTGGC                                                                                                  |
| P32         | GGTTAATTCCTCCTGTTAGCC                                                                                                 |
| P33         | AACAGCCAAGCTCTTACTAGAAATTTATCGTCGTCATCCTTATAATCG                                                                      |
| P34         | GGGTTTGTTTCTTGGCTTATTACCTATGGCTGG                                                                                     |
| P35         | CCAAGAAACAAACCCACCGAAACAACCG                                                                                          |
| P36         | CATTACCTATATTTGGCTCATTATTCGGGGCGCGGTGGAAATGC                                                                          |
| P37         | CGAATAATGAGCCAAATATAGGTAATGAAGCAAGGGTCAAACCCAC                                                                        |
| P38         | AATGCCGGAAGCGGAATTTCTCAACCGCTGC                                                                                       |
| P39         | TCCGCTTCCGGCATTTCACCGCGCC                                                                                             |
| P40         | ACGAATCGGCGGAACAAGGGTTTGACCGGGCAAGC                                                                                   |
| P41         | GTTCCGCGGATTCGTCAACCAACGCGGCCGC                                                                                       |
| P42         | ACCTGTCGGCGTTTCAAGGGTTTGACCGGGCAAGC                                                                                   |
| P43         | GAAACGCCGACAGGTCAACCAACGCGGCCG                                                                                        |
| P44         | CCTGCTCGGAGATCCGACAGAAGGGGCGTTCGGCG                                                                                   |
| P45         | GACGCCCTTCTGTCGGATCTCCGAGCAGGGCCG                                                                                     |
| P46         | GACTGCCGACATTTGGGGCGTGGCGGCCGCG                                                                                       |



|      |                                                                                        |
|------|----------------------------------------------------------------------------------------|
| P47  | CAAATGTCGGCAGTCCGAGCAGGGCCGAAGC                                                        |
| P48  | GCTGCTGATGGAAATATTCGGGGAATACATGGCCGATCTGCGGTTTGATG                                     |
| P49  | CGGCCATGTATTCGCCGAATATTTCCATCAGCAGCCCGAACACAGCCG                                       |
| P50  | GTTTATATTCGGGCTGTACATGGCCGATCTGCGGT                                                    |
| P51  | AGCCCGAATATAAACATCAGCAGCCCGAACACA                                                      |
| P52  | AACGGCATGGTATGTCACGGACATTTCTCGCG                                                       |
| P53  | ACATACCATGCCGTTGTCTGGTCAATCTTG                                                         |
| P54  | TGCCATTTGGACGGTGCCGGATGAGCTG                                                           |
| P55  | ACCGTCCAAATGGCATTAGCGATTTTCGCTTG                                                       |
| P56  | CGAAATCTGGAATGCCATTACCACGGTGCC                                                         |
| P57  | GCATTCCAGATTTGCCTTGATACAAACCACCG                                                       |
| P58  | TGTCACGTGGATTTCTCGCGGGCAATCG                                                           |
| P59  | GAAATCCACGTGACATACGTTGCCGTTGTC                                                         |
| P60  | GATTGACTGGACAACGGCAACGTATGTCACG                                                        |
| P61  | GTTGTCCAGTCAATCTTGTTGAAAAGCGG                                                          |
| P62  | GGTGCCGTGGGAGCTGGCTTCGGCCCTG                                                           |
| P63  | AGCTCCACGGCACCGTGGTAATGGC                                                              |
| Rec1 | GGAGACGCCGGTAGGCCAGTTCATTCCATACTCGCACCACGTTACTGACACGATCAATTAACCCTCACTA<br>AAGGGCGGCCGC |
| Rec2 | CCACACCGCCGGTCTCGACTTCGGCAATAATGCTTTCGGCAATTTGGCTAATACGACTCACTAT<br>AGGGCTCGAGGAAGTTCC |
| Rec3 | CGCACCCTGCGCATCGAGCGCAATTCACATATAGCCAAGGCCAATGCCATAATACGACTCACTATAG<br>GGCTCGAG        |
| Rec4 | GTTCCAAGGCGACGGGATGCCAAAAATCCGGTAGGGAGGAAATTGCCGTGTAAAATTAACCCTCACTAA<br>AGGGCGGCCGC   |

### Supplementary References

- 1 Redzej, A. *et al.* Structure of a VirD4 coupling protein bound to a VirB type IV secretion machinery. *EMBO J* **36**, 3080-3095, doi:10.15252/embj.201796629 (2017).
